# Supplementary material
Source: Springer Nature journal article supplement (https://www.springermedizin.de/resource/supplementary/12889_2006_444_MOESM1_ESM.pdf/9500882)

# Figures

## Figure 1 - Participant flow chart

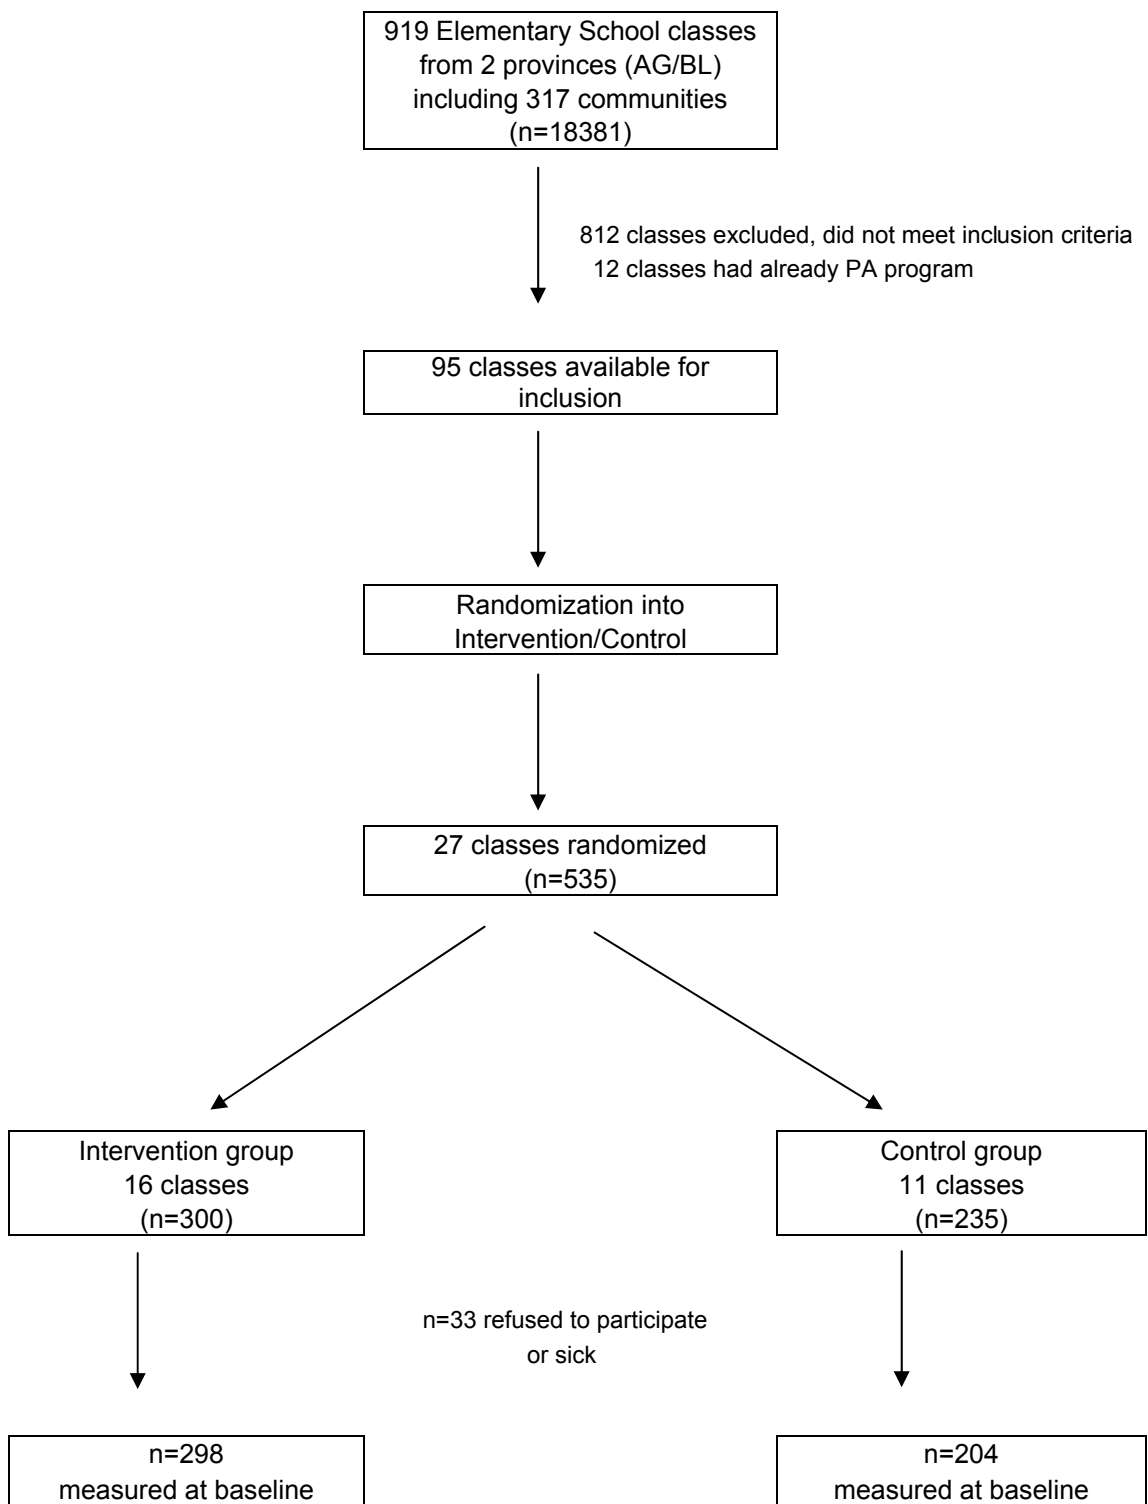

Supplement: MOESM1 [file 9500882]
